# Supplementary material for: Synthesis of highly fluorescent Cu/Au bimetallic nanoclusters and their application in a temperature sensor and fluorescent probe for chromium(iii) ions
Source: Royal Society of Chemistry journal article supplement (doi:10.1039/c8ra02118j), 2018-01-01
Supplement: c8ra02118j1.pdf [file c8ra02118j1.pdf]

## Supporting Information

### Synthesis of highly fluorescent Cu/Au bimetallic nanoclusters and their application in a temperature sensor and fluorescent probes for Chromium(III) Ions

Furong Nie, Lu Ga, Jun Ai\*, Yong Wang

*Inner Mongolian Key Laboratory for Physics and Chemistry of Functional Materials, Inner Mongolia Normal University, 81 zhaowudalu, Hohhot 010022, China. Address here. E-mail: imacaj01@163.com*

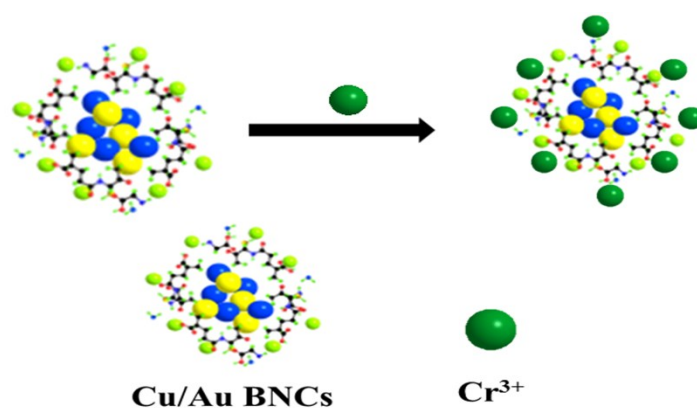

**Scheme S1** A schematic representation of Cr<sup>3+</sup> detection.

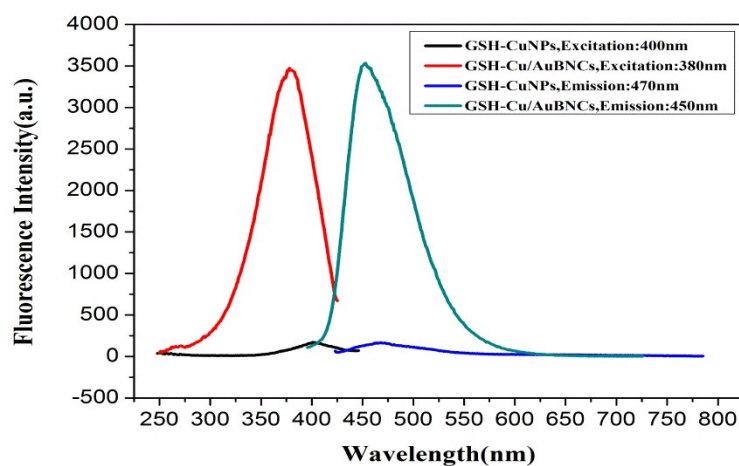

**Fig. S1** The fluorescence spectra of the Cu NCs (black line and blue line) with excitation at 400 nm and emission at 470 nm, and Cu/Au BNCs (red line and green line) with excitation at 380 nm and emission at 450 nm.

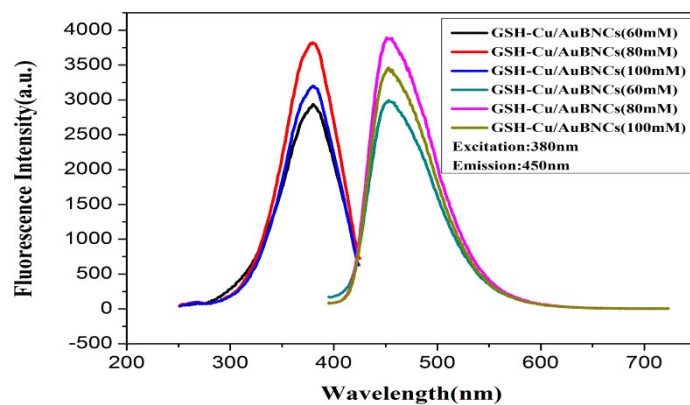

Fig. S2 The fluorescence spectra of GSH- Cu/Au BNCs solution at different  $\text{Cu}^{2+}/\text{GSH}/\text{Au}^{3+}$  molar ratios 1:4:3, 1:4:4 and 1:4:5.

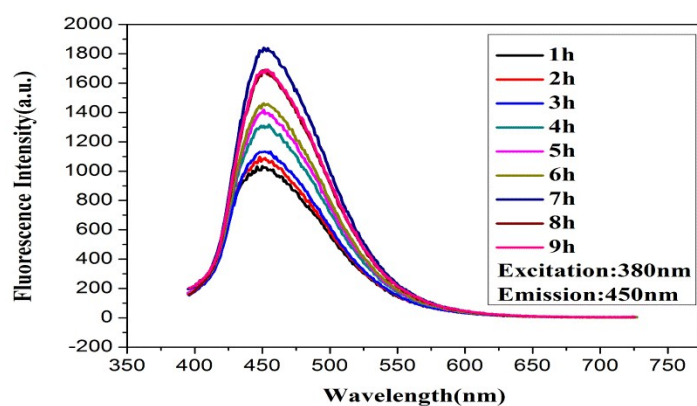

Fig. S3 The fluorescence spectra of Cu/Au BNCs at different stirring times.

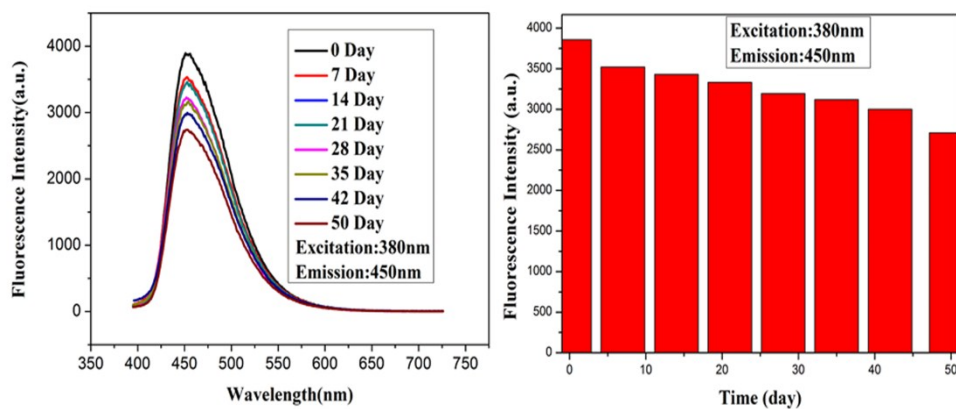

Fig. S4 Fluorescence spectra of the Cu/Au BNCs with time ranging from 0 to 50 day.

The Cu/Au BNCs are deposited on the copper network of carbon support membrane. Therefore, the content of Cu in energy spectrum (EDS) analysis is high.

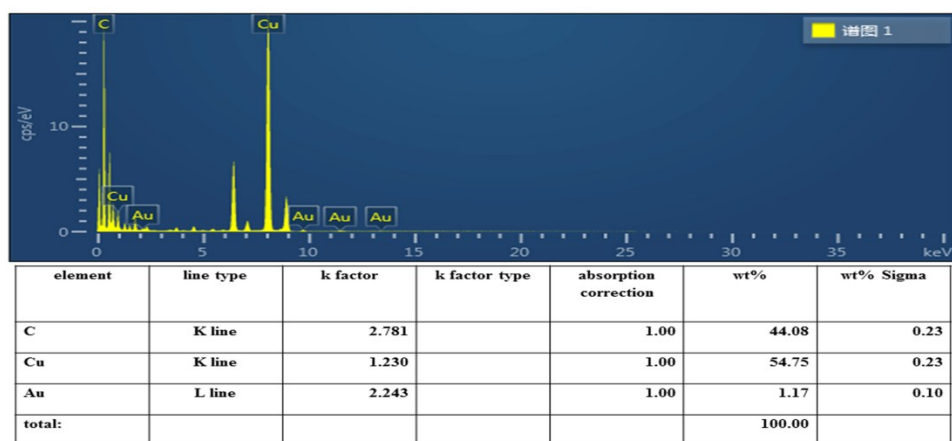

Fig. S5 EDS image of Cu/Au BNCs (Each sample was deposited on the carbon support membrane copper net for testing).

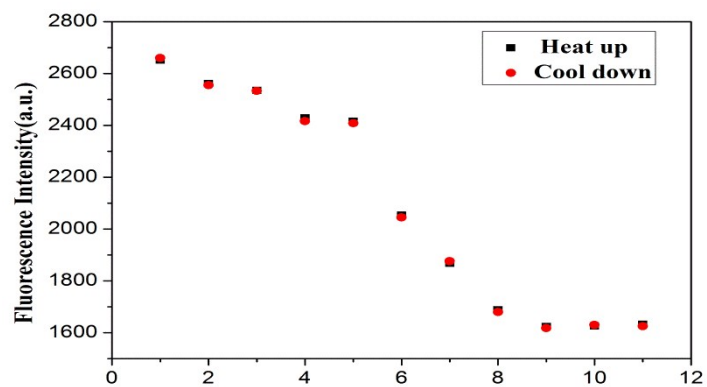

Fig. S6 Fluorescence intensities of Cu/Au BNCs upon 20°C to 70°C (black spots) and restore the initial temperature (red spots).

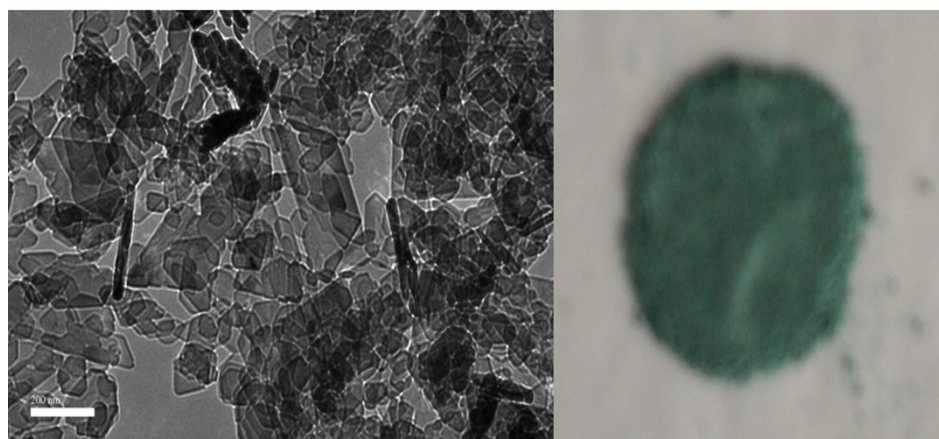

Fig. S7 TEM image of the Cu/Au BNCs detection of  $\text{Cr}^{3+}$  (left) and grey green sediment Chromium hydroxide (right).

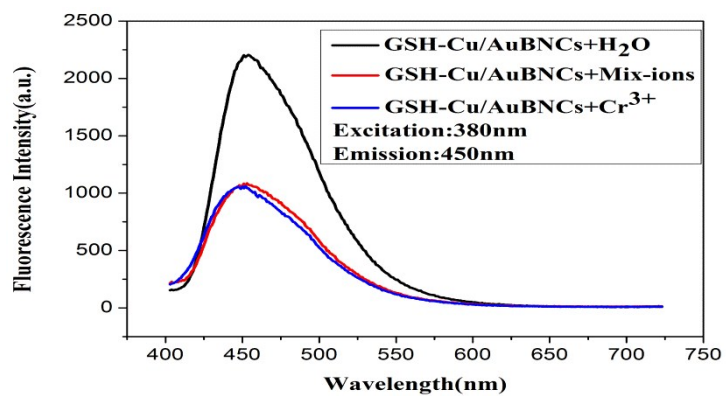

**Fig. S8** The fluorescence spectra of the Cu/Au BNCs in presence of various metal ions mixtures (including: Zn<sup>2+</sup>, Cr<sup>3+</sup>, Co<sup>2+</sup>, Pb<sup>2+</sup>, Ni<sup>2+</sup>, Cu<sup>2+</sup>, Mn<sup>2+</sup>, Cd<sup>2+</sup>, red line) and the Cu/Au BNCs upon the addition of Cr<sup>3+</sup> (blue line).
